# Supplementary material
Source: PubMed Central journal article supplement (PMC2533234)
Supplement: 0805423105_0805423105SI.pdf [file 0805423105_0805423105SI.pdf]

# Supporting Information

Leber et al. 10.1073/pnas.0805423105

|             | R PostCentG | SupCol | SubThalNuc | L Putamen | R AI  | R MFG | R IFG | L MFG | ACC   | L ACC | L SFS | L SPL-2 | L IPL | L IPS | R SPL | L SPL | R SPL-3 | R SPL-2 | R IPL | PostCing |
|-------------|-------------|--------|------------|-----------|-------|-------|-------|-------|-------|-------|-------|---------|-------|-------|-------|-------|---------|---------|-------|----------|
| R PostCentG |             | 2.24   | 0.39       | 3.59      | 0.41  | 0.23  | -0.45 | 0.61  | 2.19  | 3.17  | 4.56  | 5.27    | 4.79  | 2.17  | 1.63  | -0.06 | 3.43    | -1.82   | 0.98  | 2.63     |
| SupCol      | 0.05        |        | 4.71       | 4.35      | 0.86  | 0.62  | -1.55 | 1.03  | 4.19  | 3.86  | 1.95  | -0.07   | 1.32  | 2.27  | 0.82  | 1.75  | 0.63    | 1.10    | 0.46  | 3.35     |
| SubThalNuc  | 0.01        | 0.23   |            | 4.65      | 2.57  | 0.85  | 0.19  | 0.73  | 1.80  | 0.76  | 3.27  | -0.48   | 1.52  | 2.39  | -0.97 | -1.57 | 0.67    | -0.67   | -0.53 | 2.53     |
| L Putamen   | 0.08        | 0.13   | 0.12       |           | 8.23  | 3.21  | 1.49  | 5.91  | 5.42  | 3.95  | 5.22  | 0.88    | 4.00  | 1.06  | -0.19 | 0.72  | 0.89    | -2.68   | 1.25  | 3.95     |
| R AI        | 0.01        | 0.03   | 0.08       | 0.22      |       | 7.42  | 4.44  | 5.14  | 6.57  | 2.57  | 3.20  | 0.75    | 2.33  | -0.50 | 1.60  | 0.95  | 3.84    | 0.42    | 6.21  | 0.98     |
| R MFG       | 0.00        | 0.01   | 0.02       | 0.08      | 0.18  |       | 4.61  | 6.41  | 6.15  | -0.37 | 3.83  | 2.13    | 4.37  | 1.55  | 2.76  | 6.51  | 6.38    | 5.29    | 4.75  | 2.82     |
| R IFG       | -0.01       | -0.03  | 0.00       | 0.04      | 0.13  | 0.12  |       | 7.77  | 4.22  | 2.68  | -0.14 | -1.18   | 3.43  | 0.97  | 0.68  | -1.02 | 1.06    | 0.90    | 4.57  | 3.38     |
| L MFG       | 0.01        | 0.03   | 0.02       | 0.13      | 0.16  | 0.14  | 0.12  |       | 8.29  | 1.53  | 4.12  | 0.82    | 7.03  | 5.89  | 2.96  | 5.00  | 3.16    | 3.66    | 3.40  | 0.68     |
| ACC         | 0.06        | 0.11   | 0.05       | 0.12      | 0.18  | 0.12  | 0.11  | 0.25  |       | 8.61  | 6.41  | -0.31   | 7.75  | 5.71  | 2.37  | 3.81  | 3.67    | 10.34   | 2.90  | 3.38     |
| L ACC       | 0.07        | 0.07   | 0.02       | 0.09      | 0.05  | -0.01 | 0.04  | 0.04  | 0.18  |       | 5.11  | 1.33    | 2.83  | 2.57  | 2.33  | 1.24  | 3.81    | 2.54    | -0.07 | 3.13     |
| L SFS       | 0.12        | 0.06   | 0.07       | 0.13      | 0.09  | 0.07  | 0.00  | 0.10  | 0.21  | 0.13  |       | 6.29    | 8.57  | 4.92  | 1.95  | 5.51  | 8.22    | 2.94    | 0.83  | 2.35     |
| L SPL-2     | 0.13        | 0.00   | -0.01      | 0.02      | 0.02  | 0.05  | -0.03 | 0.02  | -0.01 | 0.02  | 0.13  |         | 5.39  | 3.46  | 4.07  | 8.72  | 7.76    | 2.52    | 1.13  | 1.50     |
| L IPL       | 0.13        | 0.04   | 0.04       | 0.09      | 0.06  | 0.13  | 0.11  | 0.33  | 0.28  | 0.07  | 0.24  | 0.21    |       | 12.13 | 6.62  | 10.27 | 10.58   | 5.48    | 6.08  | 3.85     |
| L IPS       | 0.04        | 0.05   | 0.03       | 0.02      | -0.01 | 0.04  | 0.02  | 0.27  | 0.19  | 0.05  | 0.15  | 0.09    | 0.49  |       | 9.18  | 11.69 | 9.20    | 6.26    | 2.71  | 2.07     |
| R SPL       | 0.04        | 0.01   | -0.03      | 0.00      | 0.05  | 0.09  | 0.02  | 0.10  | 0.07  | 0.04  | 0.06  | 0.18    | 0.28  | 0.25  |       | 13.07 | 10.73   | 6.28    | 4.47  | 3.27     |
| L SPL       | 0.00        | 0.04   | -0.04      | 0.01      | 0.02  | 0.13  | -0.03 | 0.16  | 0.11  | 0.02  | 0.21  | 0.29    | 0.38  | 0.28  | 0.33  |       | 12.34   | 11.36   | 4.75  | 3.54     |
| R SPL-3     | 0.07        | 0.01   | 0.02       | 0.02      | 0.11  | 0.13  | 0.03  | 0.09  | 0.09  | 0.05  | 0.19  | 0.20    | 0.28  | 0.14  | 0.29  | 0.34  |         | 9.14    | 3.82  | 5.06     |
| R SPL-2     | -0.05       | 0.03   | -0.02      | -0.04     | 0.01  | 0.12  | 0.03  | 0.09  | 0.16  | 0.03  | 0.07  | 0.09    | 0.23  | 0.21  | 0.26  | 0.40  | 0.32    |         | 3.19  | 7.28     |
| R IPL       | 0.03        | 0.01   | -0.01      | 0.03      | 0.14  | 0.14  | 0.16  | 0.11  | 0.09  | 0.00  | 0.02  | 0.05    | 0.27  | 0.09  | 0.17  | 0.13  | 0.13    | 0.12    |       | 3.81     |
| PostCing    | 0.07        | 0.11   | 0.08       | 0.07      | 0.01  | 0.09  | 0.05  | 0.01  | 0.12  | 0.06  | 0.05  | 0.03    | 0.14  | 0.06  | 0.08  | 0.11  | 0.13    | 0.18    | 0.11  |          |

**Fig. S1.** Raw values of cross-correlation analysis. Mean Fischer z-values are shown below the diagonal; t-values from group-level random-effects analysis on the Fischer z-values are shown above the diagonal. ACC, anterior cingulate cortex; AI, anterior insula; IPL, inferior parietal lobule; IPS, intraparietal sulcus; L, left; MFG, middle frontal gyrus; R, right; SFS, superior frontal sulcus; SPL, superior parietal lobule; SubThalNuc, subthalamic nucleus; SupCol, superior colliculus. PostCentG, Postcentral Gyrus; PostCing, Posterior Cingulate.

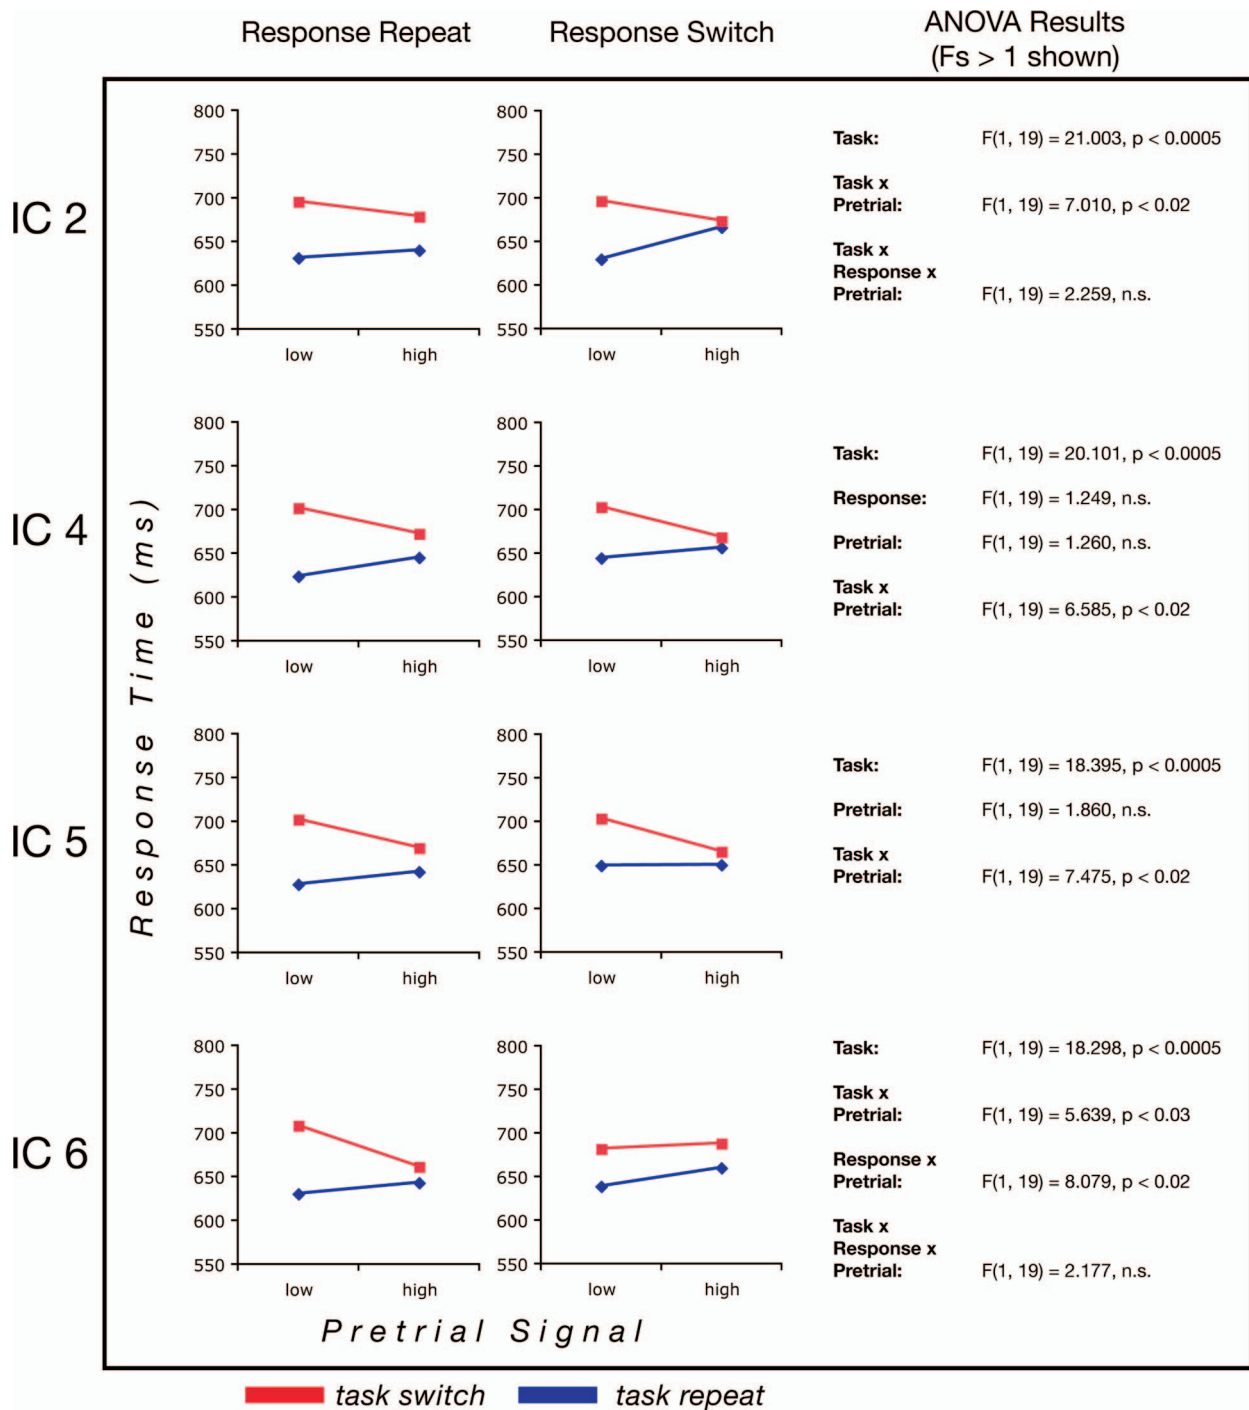

**Fig. S2.** Pretrial signal from sources IC2, IC4, IC5, and IC6 predict the task switch cost, irrespective of response transition (response repeat versus response switch). RT is plotted as a function of pretrial signal, response transition, and task transition (task repeat versus task switch). Pretrial signal was sorted into "low" and "high" via a median split carried out within each participant. Pretrial signal, response transition, and task transition were entered as independent variables into  $2 \times 2 \times 2$  repeated measures ANOVAs for each IC. Results of the ANOVAs are shown in the right column. "Task" indicates task transition, "response" indicates response transition, and "pretrial" indicates pretrial signal. Only  $F_s > 1$  are reported.

**Table S1. Alternative analysis 1: Removing contributions of previous evoked responses from the pretrial signal**

| ROI            | Coordinates |          |          | Relationship between pretrial signal and RT |          |                |          | Difference in slopes ( <i>P</i> ) |
|----------------|-------------|----------|----------|---------------------------------------------|----------|----------------|----------|-----------------------------------|
|                |             |          |          | Switch                                      |          | Repeat         |          |                                   |
|                | <i>X</i>    | <i>Y</i> | <i>Z</i> | $\Delta$ ms/sd                              | <i>P</i> | $\Delta$ ms/sd | <i>P</i> |                                   |
| L IPL          | -40         | -46      | 42       | -21.893                                     | 0.0024   | 13.072         | 0.0542   | 0.0003                            |
| SupCol         | -1          | -29      | -2       | -24.177                                     | 0.0013   | 10.733         | 0.0391   | 0.0007                            |
| L MFG          | -39         | 29       | 20       | -16.031                                     | 0.0264   | 14.134         | 0.0241   | 0.0014                            |
| R SPL          | 22          | -67      | 45       | -11.535                                     | 0.0796   | 10.112         | 0.0382   | 0.0059                            |
| R AI           | 37          | 11       | 11       | -22.696                                     | 0.0002   | 9.840          | 0.0914   | 0.0001                            |
| L SPL          | -11         | -65      | 48       | -18.371                                     | 0.0022   | 7.900          | 0.1448   | 0.0024                            |
| L IPS          | -31         | -68      | 37       | -16.405                                     | 0.0365   | 7.918          | 0.0420   | 0.0049                            |
| ACC            | -6          | 10       | 42       | -15.310                                     | 0.0094   | 16.805         | 0.0069   | 0.0007                            |
| L Putamen      | -24         | 1        | 11       | -14.491                                     | 0.0273   | 16.833         | 0.0125   | 0.0037                            |
| R SPL-2        | 4           | -70      | 41       | -3.105                                      | 0.5734   | 16.841         | 0.0170   | 0.0078                            |
| L SFS          | -23         | -10      | 51       | -14.788                                     | 0.0071   | 18.980         | 0.0074   | 0.0008                            |
| R MFG          | 33          | 39       | 28       | -15.173                                     | 0.0055   | 5.567          | 0.1674   | 0.0013                            |
| SubThalNuc     | 2           | -13      | -2       | -15.062                                     | 0.0213   | 13.814         | 0.0057   | 0.0029                            |
| R SPL-3        | 11          | -63      | 47       | -12.307                                     | 0.0488   | 10.717         | 0.0974   | 0.0162                            |
| R IPL          | 50          | -40      | 50       | -22.721                                     | 0.0001   | 5.459          | 0.3603   | 0.0024                            |
| R IFG          | 39          | 41       | 3        | -18.924                                     | 0.0002   | 1.304          | 0.8367   | 0.0040                            |
| L SPL-2        | -24         | -55      | 53       | -12.427                                     | 0.0964   | 13.953         | 0.0189   | 0.0071                            |
| PostCingG      | 2           | -36      | 41       | -17.609                                     | 0.0057   | 9.301          | 0.1067   | 0.0014                            |
| L ACC          | -16         | 4        | 42       | -9.637                                      | 0.0580   | 18.021         | 0.0062   | 0.0007                            |
| R PostcentralG | 48          | -22      | 38       | -11.567                                     | 0.0999   | 12.360         | 0.0373   | 0.0043                            |

$\Delta$  ms/sd, change in RT per standard deviation of pretrial signal; ACC, anterior cingulate cortex; AI, anterior insula; IFG, inferior frontal gyrus; IPL, inferior parietal lobule; IPS, intraparietal sulcus; L, left; MFG, middle frontal gyrus; R, right; SFS, superior frontal sulcus; SPL, superior parietal lobule; SubThalNuc, subthalamic nucleus; SupCol, superior colliculus. PostCentralG, postcentral gyrus; PostCingG, posterior cingulate gyrus.

**Table S2. Alternative analysis 2: Removing contributions of previous trial RT from the pretrial signal**

| ROI            | Coordinates |          |          | Relationship between pretrial signal and RT |          |                |          | Difference in slopes ( <i>P</i> ) |
|----------------|-------------|----------|----------|---------------------------------------------|----------|----------------|----------|-----------------------------------|
|                |             |          |          | Switch                                      |          | Repeat         |          |                                   |
|                | <i>X</i>    | <i>Y</i> | <i>Z</i> | $\Delta$ ms/sd                              | <i>P</i> | $\Delta$ ms/sd | <i>P</i> |                                   |
| L IPL          | -40         | -46      | 42       | -22.264                                     | 0.0013   | 12.754         | 0.0497   | 0.0002                            |
| SupCol         | -1          | -29      | -2       | -21.595                                     | 0.0013   | 6.659          | 0.1048   | 0.0009                            |
| L MFG          | -39         | 29       | 20       | -17.152                                     | 0.0155   | 13.475         | 0.0176   | 0.0009                            |
| R SPL          | 22          | -67      | 45       | -11.672                                     | 0.0295   | 9.214          | 0.0408   | 0.0012                            |
| R AI           | 37          | 11       | 11       | -19.153                                     | 0.0004   | 9.771          | 0.0966   | 0.0003                            |
| L SPL          | -11         | -65      | 48       | -17.122                                     | 0.0030   | 6.217          | 0.2008   | 0.0017                            |
| L IPS          | -31         | -68      | 37       | -15.067                                     | 0.0214   | 8.991          | 0.0087   | 0.0022                            |
| ACC            | -6          | 10       | 42       | -13.699                                     | 0.0163   | 12.059         | 0.0405   | 0.0025                            |
| L Putamen      | -24         | 1        | 11       | -16.516                                     | 0.0172   | 16.526         | 0.0195   | 0.0024                            |
| R SPL-2        | 4           | -70      | 41       | -3.766                                      | 0.3558   | 12.503         | 0.0330   | 0.0093                            |
| L SFS          | -23         | -10      | 51       | -13.998                                     | 0.0112   | 17.673         | 0.0100   | 0.0007                            |
| R MFG          | 33          | 39       | 28       | -12.959                                     | 0.0051   | 3.802          | 0.3065   | 0.0007                            |
| SubThalNuc     | 2           | -13      | -2       | -14.378                                     | 0.0152   | 11.774         | 0.0089   | 0.0017                            |
| R SPL-3        | 11          | -63      | 47       | -10.003                                     | 0.0668   | 10.229         | 0.1130   | 0.0109                            |
| R IPL          | 50          | -40      | 50       | -18.163                                     | 0.0004   | 4.675          | 0.3541   | 0.0025                            |
| R IFG          | 39          | 41       | 3        | -17.142                                     | 0.0006   | -0.864         | 0.8754   | 0.0069                            |
| L SPL-2        | -24         | -55      | 53       | -10.806                                     | 0.0582   | 12.075         | 0.0348   | 0.0046                            |
| PostCingG      | 2           | -36      | 41       | -13.320                                     | 0.0224   | 6.862          | 0.2009   | 0.0027                            |
| L ACC          | -16         | 4        | 42       | -9.693                                      | 0.0318   | 16.054         | 0.0128   | 0.0018                            |
| R PostcentralG | 48          | -22      | 38       | -11.955                                     | 0.0922   | 13.828         | 0.0282   | 0.0021                            |

$\Delta$  ms/sd, change in RT per standard deviation of pretrial signal; ACC, anterior cingulate cortex; AI, anterior insula; IFG, inferior frontal gyrus; IPL, inferior parietal lobule; IPS, intraparietal sulcus; L, left; MFG, middle frontal gyrus; R, right; SFS, superior frontal sulcus; SPL, superior parietal lobule; SubThalNuc, subthalamic nucleus; SupCol, superior colliculus. PostCentralG, postcentral gyrus; PostCing, posterior cingulate gyrus.
